# Supplementary material for: From Genotype to Phenotype: Nonsense Variants in SLC13A1 Are Associated with Decreased Serum Sulfate and Increased Serum Aminotransferases
Source: PubMed Central journal article supplement (PMC5015947; doi:10.1534/g3.116.032979), 2016-07-13
Supplement: supp_g3.116.032979_TableS1.pdf [file supp_g3.116.032979_TableS1.pdf]

**Table S1. Minor allele frequency enrichment summary of nonsense variants in the Old Order Amish (n=1,725) compared to 1000g<sub>(EUR)</sub> and ESP<sub>(EA)</sub> populations.**

1000g<sub>(EUR)</sub>

|                           | Ratio >1 | Ratio <1 | Ratio Unknown | Total |
|---------------------------|----------|----------|---------------|-------|
| <b><i>P</i> &lt; 0.05</b> | 67       | 79       | 0             | 146   |
| <b><i>P</i> &gt; 0.05</b> | 30       | 32       | 0             | 62    |
| <b><i>P</i> N.C.</b>      | 34       | 4        | 20            | 58    |
| <b>Total</b>              | 131      | 115      | 20            | 266   |

ESP<sub>(EA)</sub>

|                           | Ratio >1 | Ratio <1 | Ratio Unknown | Total |
|---------------------------|----------|----------|---------------|-------|
| <b><i>P</i> &lt; 0.05</b> | 103      | 84       | 0             | 187   |
| <b><i>P</i> &gt; 0.05</b> | 22       | 23       | 0             | 45    |
| <b><i>P</i> N.C.</b>      | 6        | 8        | 20            | 34    |
| <b>Total</b>              | 131      | 115      | 20            | 266   |

Abbreviations: 1000g<sub>(EUR)</sub>, Total European Ancestry population from 1000 Genomes; ESP<sub>(EA)</sub>, European American population from the National Heart, Lung, and Blood Institute (NHLBI) Exome Sequencing Project (ESP); Ratio, minor allele frequency in the Old Order Amish divided by the minor allele frequency in the relevant population; N.C., not calculated.
