# Supplementary material for: From Genotype to Phenotype: Nonsense Variants in SLC13A1 Are Associated with Decreased Serum Sulfate and Increased Serum Aminotransferases
Source: PubMed Central journal article supplement (PMC5015947; doi:10.1534/g3.116.032979), 2016-07-13
Supplement: supp_g3.116.032979_TableS2.pdf [file supp_g3.116.032979_TableS2.pdf]

**Table S2. SNV characteristics in relevant cohorts.**

| Cohort                    | Allele Characteristics        | <i>SLC13A1</i><br>rs28364172<br>(R12X) |                         | <i>SLC13A1</i><br>rs138275989<br>(W48X) |      | <i>SLC13A1</i><br>rs2140516,<br>(N174S) |       | <i>SLC13A1</i><br>rs139376972<br>(R237C) |       | <i>SLC26A1</i><br>rs148386572<br>(L348P) |      |
|---------------------------|-------------------------------|----------------------------------------|-------------------------|-----------------------------------------|------|-----------------------------------------|-------|------------------------------------------|-------|------------------------------------------|------|
|                           |                               | G                                      | A                       | C                                       | T    | T                                       | C     | G                                        | A     | A                                        | G    |
|                           |                               | <b>1000g<sub>(EUR)</sub></b>           | <b>Allele Freq. (%)</b> | 99.60                                   | 0.40 | 99.90                                   | 0.10  | 66.30                                    | 33.70 | n/a                                      | n/a  |
| <b>ESP<sub>(EA)</sub></b> | <b>Allele Freq. (%)</b>       | 99.77                                  | 0.23                    | 99.80                                   | 0.20 | 68.49                                   | 31.51 | 99.84                                    | 0.16  | 99.78                                    | 0.22 |
| <b>Old Order Amish</b>    | <b>Allele Freq. (%)</b>       | 99.71                                  | 0.29                    | 99.26                                   | 0.74 | 60.61                                   | 39.39 | 98.26                                    | 1.74  | 93.19                                    | 6.81 |
|                           | <b>Homozygotes</b>            | 3901                                   | 0                       | 3726                                    | 0    | 621                                     | 255   | 1666                                     | 1     | 1503                                     | 13   |
|                           | <b>Heterozygotes</b>          | 23                                     |                         | 56                                      |      | 848                                     |       | 58                                       |       | 209                                      |      |
|                           | <b><i>P</i><sub>HWE</sub></b> | 0.85                                   |                         | 0.65                                    |      | 0.21                                    |       | 0.55                                     |       | 0.08                                     |      |
|                           | <b>Total</b>                  | 3924                                   |                         | 3782                                    |      | 1724                                    |       | 1725                                     |       | 1725                                     |      |
| <b>Sulfate Cohort</b>     | <b>Allele Freq. (%)</b>       | 99.13                                  | 0.87                    | 98.00                                   | 2.00 | 60.67                                   | 39.33 | 97.06                                    | 2.94  | 93.67                                    | 6.33 |
|                           | <b>Homozygotes</b>            | 960                                    | 0                       | 938                                     | 0    | 333                                     | 141   | 848                                      | 1     | 792                                      | 6    |
|                           | <b>Heterozygotes</b>          | 17                                     |                         | 39                                      |      | 426                                     |       | 51                                       |       | 102                                      |      |
|                           | <b><i>P</i><sub>HWE</sub></b> | 0.78                                   |                         | 0.52                                    |      | 0.81                                    |       | 0.80                                     |       | 0.18                                     |      |
|                           | <b>Total</b>                  | 977                                    |                         | 977                                     |      | 900                                     |       | 900                                      |       | 900                                      |      |

Abbreviations: 1000g(EUR), Total European Ancestry population from 1000 Genomes; ESP(EA), European American population from the National Heart, Lung, and Blood Institute (NHLBI) Exome Sequencing Project (ESP); Freq., frequency; HWE, Hardy-Weinberg Equilibrium.
