# Supplementary material for: From Genotype to Phenotype: Nonsense Variants in SLC13A1 Are Associated with Decreased Serum Sulfate and Increased Serum Aminotransferases
Source: PubMed Central journal article supplement (PMC5015947; doi:10.1534/g3.116.032979), 2016-07-13
Supplement: supp_g3.116.032979_TableS3.pdf [file supp_g3.116.032979_TableS3.pdf]

**Table S3a. Associations between serum sulfate and *SLC13A1* nonsense SNVs (n=977).**

| SNV covariate(s)        | $\beta_{\text{SNV}} \pm \text{SE}$ (mM) | $\beta_{\text{SNV}}/\text{Mean}_{\text{WT}}$ | $P_{\text{SNV}}$                              | $h^2 \pm \text{SE}$ | $P_{h^2}$             | %AVE | R <sup>2</sup> | %TVE |
|-------------------------|-----------------------------------------|----------------------------------------------|-----------------------------------------------|---------------------|-----------------------|------|----------------|------|
| No SNVs                 | -                                       | -                                            | -                                             | 0.40 ± 0.07         | 1.8x10 <sup>-16</sup> | -    | 0.13           | -    |
| <b>R12X</b>             | -0.096 ± 0.019                          | -0.27                                        | 2.9x10 <sup>-7</sup>                          | 0.40 ± 0.07         | 7.5x10 <sup>-15</sup> | 1    | 0.15           | 2    |
| <b>W48X</b>             | -0.096 ± 0.013                          | -0.27                                        | 1.3x10 <sup>-12</sup>                         | 0.31 ± 0.07         | 6.0x10 <sup>-9</sup>  | 24   | 0.19           | 6    |
| <b>R12X<br/>W48X</b>    | -0.099 ± 0.018<br>-0.099 ± 0.013        | -                                            | 2.7x10 <sup>-8</sup><br>6.9x10 <sup>-14</sup> | 0.28 ± 0.07         | 5.3x10 <sup>-6</sup>  | 31   | 0.22           | 9    |
| <b>Nonsense Carrier</b> | -0.099 ± 0.011                          | -0.27                                        | 8.8x10 <sup>-20</sup>                         | 0.28 ± 0.07         | 5.3x10 <sup>-6</sup>  | 31   | 0.22           | 9    |

*SLC13A1* R12X and W48X genotyping was performed for all individuals for whom serum sulfate was measured. Analyses were adjusted for gender, study, and study-age. Abbreviations: SE, standard error; h<sup>2</sup>, heritability; AVE, additive variance explained; TVE, total variance explained.

**Table S3b. Associations between serum sulfate, and *SLC13A1* and *SLC26A1* SNVs (n=900).**

| SNV covariate(s)                                   | $\beta_{\text{SNV}} \pm \text{SE}$ (mM)                                              | $\beta_{\text{SNV}}/\text{Mean}_{\text{WT}}$ | $P_{\text{SNV}}$                                                                                      | $h^2 \pm \text{SE}$ | $P_{h^2}$             | %AVE | R <sup>2</sup> | %TVE |
|----------------------------------------------------|--------------------------------------------------------------------------------------|----------------------------------------------|-------------------------------------------------------------------------------------------------------|---------------------|-----------------------|------|----------------|------|
| No SNVs                                            | -                                                                                    | -                                            | -                                                                                                     | 0.44 ± 0.08         | 7.9x10 <sup>-17</sup> | -    | 0.10           | -    |
| N174S                                              | 0.012 ± 0.003                                                                        | 0.03                                         | 1.6x10 <sup>-4</sup>                                                                                  | 0.43 ± 0.08         | 3.6x10 <sup>-16</sup> | 2    | 0.12           | 2    |
| R237C                                              | 0.015 ± 0.010                                                                        | 0.04                                         | 0.15                                                                                                  | 0.44 ± 0.08         | 1.6x10 <sup>-16</sup> | 0    | 0.11           | 0    |
| <b>R12X<br/>(GWAS)</b>                             | -0.088 ± 0.019                                                                       | -                                            | 7.5x10 <sup>-6</sup>                                                                                  | 0.42 ± 0.08         | 2.2x10 <sup>-14</sup> | 3    | 0.13           | 2    |
| <b>W48X<br/>(GWAS)</b>                             | -0.082 ± 0.015                                                                       | -                                            | 2.7x10 <sup>-8</sup>                                                                                  | 0.36 ± 0.08         | 1.6x10 <sup>-10</sup> | 18   | 0.15           | 5    |
| <b>L348P<br/>(GWAS)</b>                            | -0.046 ± 0.006                                                                       | 0.12                                         | 4.4x10 <sup>-12</sup>                                                                                 | 0.43 ± 0.08         | 2.1x10 <sup>-15</sup> | 3    | 0.15           | 5    |
| <b>R12X<br/>W48X<br/>L348P</b>                     | -0.094 ± 0.018<br>-0.080 ± 0.014<br>-0.045 ± 0.006                                   | -                                            | 3.5x10 <sup>-7</sup><br>9.5x10 <sup>-9</sup><br>9.7x10 <sup>-13</sup>                                 | 0.32 ± 0.08         | 2.9x10 <sup>-7</sup>  | 27   | 0.22           | 12   |
| <b>R12X<br/>W48X<br/>N174S<br/>R237C<br/>L348P</b> | -0.091 ± 0.018<br>-0.076 ± 0.014<br>0.009 ± 0.003<br>0.008 ± 0.010<br>-0.045 ± 0.006 | -                                            | 5.8x10 <sup>-7</sup><br>5.3x10 <sup>-8</sup><br>3.4x10 <sup>-3</sup><br>0.40<br>9.2x10 <sup>-13</sup> | 0.31 ± 0.08         | 6.4x10 <sup>-7</sup>  | 29   | 0.23           | 13   |

*SLC13A1* N174S and R237C, and *SLC26A1* L348P genotyping was performed on 900 of the 977 individuals for whom serum sulfate was measured. Analyses were adjusted for gender, study, and study-age. Abbreviations: SE, standard error; h<sup>2</sup>, heritability; AVE, additive variance explained; TVE, total variance explained.
