# Supplementary material for: From Genotype to Phenotype: Nonsense Variants in SLC13A1 Are Associated with Decreased Serum Sulfate and Increased Serum Aminotransferases
Source: PubMed Central journal article supplement (PMC5015947; doi:10.1534/g3.116.032979), 2016-07-13
Supplement: supp_g3.116.032979_TableS4.pdf [file supp_g3.116.032979_TableS4.pdf]

**Table S4. Top 20 serum sulfate exome-wide association study (ExWAS) results using the Illumina Human Exome BeadChip platform (n=900).**

| rs Number   | Gene                 | Type       | AA Change | Chrom.   | Position    | Freq. ExWAS | $P_{HWE}$ | Freq. 1000g <sub>(EUR)</sub> | Freq. ESP <sub>(EA)</sub> | Enrich. 1000g <sub>(EUR)</sub> | Enrich. ESP <sub>(EA)</sub> | $\beta_{SNV}$ | $P_{SNV}$      |
|-------------|----------------------|------------|-----------|----------|-------------|-------------|-----------|------------------------------|---------------------------|--------------------------------|-----------------------------|---------------|----------------|
| rs148386572 | <i>SLC26A1</i>       | exonic     | L348P     | 4p16.3   | 983,684     | 0.063       | 0.21      | 0.003                        | 0.002                     | 21.1                           | 28.4                        | -0.046        | <b>4.4E-12</b> |
| rs59932476  | <i>DOK7</i>          | exonic     | G248R     | 4p16.3   | 3,491,504   | 0.079       | 0.15      | 0.034                        | 0.032                     | 2.3                            | 2.5                         | -0.040        | 1.5E-11        |
| rs141442388 | <i>PIGG</i>          | exonic     | A434T     | 4p16.3   | 517,332     | 0.064       | 0.10      | 0.001                        | -                         | 64.4                           | -                           | -0.043        | 4.0E-11        |
| rs11549516  | <i>LRPAP1</i>        | exonic     | R113H     | 4p16.3   | 3,526,645   | 0.081       | 0.20      | 0.036                        | 0.035                     | 2.3                            | 2.3                         | -0.038        | 8.6E-11        |
| rs138275989 | <i>SLC13A1</i>       | exonic     | W48X      | 7q31.32  | 122,821,111 | 0.017       | 1.00      | 0.001                        | 0.002                     | 16.7                           | 8.4                         | -0.082        | <b>2.7E-08</b> |
| rs2498323   | <i>HGFAC</i>         | exonic     | R644Q     | 4p16.3   | 3,451,109   | 0.098       | 0.24      | 0.082                        | 0.100                     | 1.2                            | 1.0                         | -0.028        | 1.5E-07        |
| rs2306242   | <i>GAK</i>           | exonic     | K1167R    | 4p16.3   | 843,720     | 0.105       | 0.29      | 0.037                        | 0.038                     | 2.9                            | 2.8                         | -0.028        | 1.6E-07        |
| rs362272    | <i>HTT</i>           | exonic     | V2786I    | 4p16.3   | 3,234,980   | 0.247       | 0.35      | 0.309                        | 0.296                     | 0.8                            | 0.8                         | -0.019        | 2.3E-07        |
| rs962040    | <i>SGCZ, TUSC3</i>   | intergenic | -         | 8p22     | 15,311,877  | 0.251       | 0.83      | 0.733                        | -                         | 0.3                            | -                           | -0.017        | 5.8E-06        |
| rs28364172  | <i>SLC13A1</i>       | exonic     | R12X      | 7q31.32  | 122,839,967 | 0.008       | 1.00      | 0.004                        | 0.002                     | 2.1                            | 3.6                         | -0.088        | <b>7.5E-06</b> |
| rs117725783 | <i>TMEM71</i>        | exonic     | D78G      | 8q24.22  | 133,764,112 | 0.027       | 0.70      | 0.015                        | 0.020                     | 1.8                            | 1.3                         | 0.043         | 1.4E-05        |
| rs2082412   | <i>UBLCP1, IL12B</i> | intergenic | -         | 5q33.3   | 158,717,789 | 0.166       | 0.21      | 0.226                        | -                         | 0.7                            | -                           | 0.019         | 2.0E-05        |
| rs3213094   | <i>IL12B</i>         | intronic   | -         | 5q33.3   | 158,750,769 | 0.166       | 0.21      | 0.223                        | -                         | 0.7                            | -                           | 0.019         | 2.0E-05        |
| rs8069166   | <i>FAM101B</i>       | exonic     | -         | 17p13.3  | 293,138     | 0.023       | 0.58      | 0.024                        | 0.033                     | 1.0                            | 0.7                         | 0.047         | 3.1E-05        |
| rs7685686   | <i>HTT</i>           | intronic   | -         | 4p16.3   | 3,207,142   | 0.344       | 0.11      | 0.433                        | -                         | 0.8                            | -                           | -0.014        | 4.3E-05        |
| rs117360089 | <i>DMTF1</i>         | exonic     | A8P       | 7q21.12  | 86,800,364  | 0.024       | 0.55      | 0.021                        | 0.016                     | 1.1                            | 1.5                         | 0.045         | 4.4E-05        |
| rs362331    | <i>HTT</i>           | exonic     | Y2309H    | 4p16.3   | 3,215,835   | 0.343       | 0.11      | 0.433                        | 0.420                     | 0.8                            | 0.8                         | -0.014        | 4.4E-05        |
| rs4647930   | <i>FGFRL1</i>        | exonic     | P362Q     | 4p16.3   | 1,018,705   | 0.243       | 0.02      | 0.267                        | 0.270                     | 0.9                            | 0.9                         | -0.016        | 4.5E-05        |
| rs202020297 | <i>HIVEP2</i>        | exonic     | -         | 6q24.2   | 143,095,100 | 0.020       | 0.84      | -                            | 0.001                     | -                              | 13.9                        | -0.050        | 6.5E-05        |
| rs13336804  | <i>CIITA</i>         | exonic     | V782A     | 16p13.13 | 11,001,694  | 0.119       | 0.96      | 0.094                        | 0.084                     | 1.3                            | 1.4                         | -0.020        | 6.8E-05        |

Abbreviations: Freq. ExWAS, allele frequency in the 900 Amish subjects included in the ExWAS; Freq. 1000g<sub>(EUR)</sub>, allele frequency in Total European Ancestry population from 1000 Genomes; Freq. ESP<sub>(EA)</sub>, allele frequency in European American population from the National Heart, Lung, and Blood Institute (NHLBI) Exome Sequencing Project (ESP); Enrich. 1000g<sub>(EUR)</sub>, enrichment of allele frequency in the 900 Amish subjects included in the ExWAS compared to allele frequency in Total European Ancestry population from 1000 Genomes (Freq. ExWAS/Freq. 1000g<sub>(EUR)</sub>); Enrich. ESP<sub>(EA)</sub>, enrichment of allele frequency in the 900 Amish subjects included in the ExWAS compared to allele frequency in European American population from the NHLBI ESP (Freq. ExWAS/Freq. ESP<sub>(EA)</sub>).
