# Supplementary material for: From Genotype to Phenotype: Nonsense Variants in SLC13A1 Are Associated with Decreased Serum Sulfate and Increased Serum Aminotransferases
Source: PubMed Central journal article supplement (PMC5015947; doi:10.1534/g3.116.032979), 2016-07-13
Supplement: supp_g3.116.032979_TableS5.pdf [file supp_g3.116.032979_TableS5.pdf]

**Table S5. Top 20 serum sulfate exome-wide association study (ExWAS) results, adjusted for *SLC13A1* R12X and W48X, and *SLC26A1* L348P, using the Illumina Human Exome BeadChip platform (n=900).**

| rs Number   | Gene                                   | Type       | AA Change | Chrom.  | Position    | Freq. ExWAS | $P_{HWE}$ | Freq. 1000g <sub>(EUR)</sub> | Freq. ESP <sub>(EA)</sub> | Enrich. 1000g <sub>(EUR)</sub> | Enrich. ESP <sub>(EA)</sub> | $\beta_{SNV}$ | $P_{SNV}$ |
|-------------|----------------------------------------|------------|-----------|---------|-------------|-------------|-----------|------------------------------|---------------------------|--------------------------------|-----------------------------|---------------|-----------|
| rs117725783 | <i>TMEM71</i>                          | exonic     | D78G      | 8q24.22 | 133,764,112 | 0.027       | 0.70      | 0.015                        | 0.020                     | 1.8                            | 1.3                         | 0.040         | 1.8E-05   |
| rs7797400   | <i>SEMA3C</i> ,<br><i>LOC100128317</i> | intergenic | -         | 7q21.11 | 80,812,398  | 0.238       | 0.07      | 0.371                        | -                         | 0.6                            | -                           | -0.015        | 1.9E-05   |
| rs3213094   | <i>IL12B</i>                           | intronic   | -         | 5q33.3  | 158,750,769 | 0.166       | 0.21      | 0.223                        | -                         | 0.7                            | -                           | 0.017         | 4.4E-05   |
| rs2082412   | <i>UBLCPI</i> ,<br><i>IL12B</i>        | intergenic | -         | 5q33.3  | 158,717,789 | 0.166       | 0.21      | 0.226                        | -                         | 0.7                            | -                           | 0.017         | 4.4E-05   |
| rs962040    | <i>SGCZ</i> ,<br><i>TUSC3</i>          | intergenic | -         | 8p22    | 15,311,877  | 0.251       | 0.83      | 0.733                        | -                         | 0.3                            | -                           | -0.015        | 4.4E-05   |
| rs117360089 | <i>DMTF1</i>                           | exonic     | A8P       | 7q21.12 | 86,800,364  | 0.024       | 0.55      | 0.021                        | 0.016                     | 1.1                            | 1.5                         | 0.041         | 4.7E-05   |
| rs2282192   | <i>C9ORF156</i>                        | exonic     | V324M     | 9q22.33 | 100,672,338 | 0.273       | 0.64      | 0.270                        | 0.271                     | 1.0                            | 1.0                         | 0.014         | 9.3E-05   |
| rs8069166   | <i>FAM101B</i>                         | exonic     | -         | 17p13.3 | 293,138     | 0.023       | 0.58      | 0.024                        | 0.033                     | 1.0                            | 0.7                         | 0.041         | 1.1E-04   |
| rs1129411   | <i>SP110</i>                           | exonic     | W112R     | 2q37.1  | 231,077,725 | 0.127       | 0.28      | 0.883                        | 0.883                     | 0.1                            | 0.1                         | 0.018         | 1.1E-04   |
| rs2069556   | <i>TG</i>                              | exonic     | D1312G    | 8q24.22 | 133,920,518 | 0.354       | 0.38      | 0.609                        | 0.615                     | 0.6                            | 0.6                         | -0.013        | 1.3E-04   |
| rs10076782  | <i>RNF145</i>                          | intronic   | -         | 5q33.3  | 158,604,963 | 0.326       | 0.03      | 0.264                        | -                         | 1.2                            | -                           | 0.012         | 1.9E-04   |
| rs1473247   | <i>RNF145</i>                          | intronic   | -         | 5q33.3  | 158,603,571 | 0.326       | 0.03      | 0.264                        | -                         | 1.2                            | -                           | 0.012         | 1.9E-04   |
| rs789560    | <i>RAB3IP</i> ,<br><i>LINC01481</i>    | intergenic | -         | 12q15   | 70,331,827  | 0.179       | 0.86      | 0.120                        | -                         | 1.5                            | -                           | 0.015         | 2.1E-04   |
| rs6493352   | <i>MTMR10</i>                          | exonic     | R648H     | 15q13.3 | 31,234,064  | 0.130       | 0.01      | 0.188                        | 0.168                     | 0.7                            | 0.8                         | -0.017        | 2.4E-04   |
| rs61743026  | <i>OR8H3</i>                           | exonic     | T254I     | 11q12.1 | 55,890,609  | 0.061       | 0.01      | 0.094                        | 0.081                     | 0.6                            | 0.8                         | -0.025        | 2.6E-04   |
| rs140206966 | <i>OR8I2</i>                           | exonic     | T278K     | 11q12.1 | 55,861,616  | 0.061       | 0.01      | .                            | 0.000                     | -                              | 130.1                       | -0.025        | 2.6E-04   |
| rs61888286  | <i>OR8H1</i>                           | exonic     | S214F     | 11q12.1 | 56,057,898  | 0.061       | 0.01      | 0.092                        | 0.080                     | 0.7                            | 0.8                         | -0.025        | 2.6E-04   |
| rs193240312 | <i>RFXAP</i>                           | exonic     | M137T     | 13q13.3 | 37,393,904  | 0.037       | 0.16      | 0.020                        | 0.018                     | 1.9                            | 2.1                         | 0.028         | 3.4E-04   |
| rs6033098   | <i>LOC339593</i> ,<br><i>LINC00687</i> | intergenic | -         | 20p12.2 | 11,289,485  | 0.057       | 0.95      | 0.049                        | -                         | 1.2                            | -                           | 0.023         | 3.6E-04   |
| rs187821820 | <i>SPEN</i>                            | exonic     | S3466G    | 1p36.13 | 16,264,027  | 0.030       | 0.83      | -                            | 0.000                     | -                              | 128.8                       | -0.032        | 3.7E-04   |

Abbreviations: Freq. ExWAS, allele frequency in the 900 Amish subjects included in the ExWAS; Freq. 1000g<sub>(EUR)</sub>, allele frequency in Total European Ancestry population from 1000 Genomes; Freq. ESP<sub>(EA)</sub>, allele frequency in European American population from the National Heart, Lung, and Blood Institute (NHLBI) Exome Sequencing Project (ESP); Enrich. 1000g<sub>(EUR)</sub>, enrichment of allele frequency in the 900 Amish subjects included in the ExWAS compared to allele frequency in Total European Ancestry population from 1000 Genomes (Freq. ExWAS/Freq. 1000g<sub>(EUR)</sub>); Enrich. ESP<sub>(EA)</sub>, enrichment of allele frequency in the 900 Amish subjects included in the ExWAS compared to allele frequency in European American population from the NHLBI ESP (Freq. ExWAS/Freq. ESP<sub>(EA)</sub>).
