# Supplementary material for: From Genotype to Phenotype: Nonsense Variants in SLC13A1 Are Associated with Decreased Serum Sulfate and Increased Serum Aminotransferases
Source: PubMed Central journal article supplement (PMC5015947; doi:10.1534/g3.116.032979), 2016-07-13
Supplement: supp_g3.116.032979_TableS6.pdf [file supp_g3.116.032979_TableS6.pdf]

**Table S6. Top 20 serum sulfate genome-wide association study (GWAS) results using Affymetrix GeneChip platform (n=917).**

| rs Number  | Gene                           | Type       | AA Change | Chrom.  | Position    | Freq. GWAS | $P_{HWE}$ | Freq. 1000g <sub>(EUR)</sub> | Freq. ESP <sub>(EA)</sub> | Enrich. 1000g <sub>(EUR)</sub> | Enrich. ESP <sub>(EA)</sub> | $\beta_{SNV}$ | $P_{SNV}$ |
|------------|--------------------------------|------------|-----------|---------|-------------|------------|-----------|------------------------------|---------------------------|--------------------------------|-----------------------------|---------------|-----------|
| rs17684427 | <i>CADPS2</i>                  | intronic   | -         | 7q31.32 | 122,482,977 | 0.017      | 1.00      | 0.023                        | -                         | 0.7                            | -                           | -0.086        | 9.4E-10   |
| rs16864709 | <i>P2RY1, RAP2B</i>            | intergenic | -         | 3q25.2  | 152,636,304 | 0.002      | 1.00      | -                            | -                         | -                              | -                           | 0.191         | 2.7E-07   |
| rs362272   | <i>HTT</i>                     | exonic     | V2786I    | 4p16.3  | 3,234,980   | 0.232      | 0.39      | 0.309                        | 0.296                     | 0.8                            | 0.8                         | -0.020        | 3.0E-07   |
| rs6690583  | <i>MCOLN2, MCOLN3</i>          | intergenic | -         | 1p22.3  | 85,466,337  | 0.157      | 0.23      | 0.788                        | -                         | 0.2                            | -                           | -0.022        | 2.2E-06   |
| rs6859018  | <i>UBLCP1, IL12B</i>           | intergenic | -         | 5q33.3  | 158,736,992 | 0.165      | 0.31      | 0.224                        | -                         | 0.7                            | -                           | 0.021         | 3.1E-06   |
| rs3212217  | <i>IL12B</i>                   | intronic   | -         | 5q33.3  | 158,755,130 | 0.164      | 0.08      | 0.230                        | -                         | 0.7                            | -                           | 0.020         | 3.8E-06   |
| rs2082412  | <i>UBLCP1, IL12B</i>           | intergenic | -         | 5q33.3  | 158,717,789 | 0.165      | 0.15      | 0.226                        | -                         | 0.7                            | -                           | 0.020         | 4.0E-06   |
| rs10486023 | <i>FOXP2</i>                   | intronic   | -         | 7q31.1  | 114,178,653 | 0.016      | 1.00      | 0.075                        | -                         | 0.2                            | -                           | -0.067        | 4.3E-06   |
| rs3213094  | <i>IL12B</i>                   | intronic   | -         | 5q33.3  | 158,750,769 | 0.165      | 0.11      | 0.223                        | -                         | 0.7                            | -                           | 0.020         | 4.9E-06   |
| rs16982644 | <i>FAM49A</i>                  | intronic   | -         | 2p24.2  | 16,829,430  | 0.025      | 0.48      | 0.043                        | -                         | 0.6                            | -                           | -0.048        | 1.0E-05   |
| rs1371143  | <i>MCOLN2</i>                  | intronic   | -         | 1p22.3  | 85,455,532  | 0.145      | 0.08      | 0.160                        | -                         | 0.9                            | -                           | -0.021        | 1.1E-05   |
| rs4338946  | <i>ADAM23</i>                  | intronic   | -         | 2q33.3  | 207,317,096 | 0.001      | 1.00      | 0.078                        | -                         | 0.0                            | -                           | 0.278         | 1.2E-05   |
| rs16890309 | <i>ZFAND3</i>                  | intronic   | -         | 6p21.2  | 37,973,613  | 0.001      | 1.00      | -                            | -                         | -                              | -                           | 0.278         | 1.2E-05   |
| rs11041824 | <i>LMO1</i>                    | intronic   | -         | 11p15.4 | 8,270,351   | 0.063      | 0.09      | 0.090                        | -                         | 0.7                            | -                           | -0.030        | 1.6E-05   |
| rs17617539 | <i>TSPAN12, ING3</i>           | intergenic | -         | 7q31.31 | 120,588,565 | 0.022      | 0.62      | 0.084                        | -                         | 0.3                            | -                           | -0.050        | 1.9E-05   |
| rs7795223  | <i>CDK14</i>                   | intronic   | -         | 7q21.13 | 90,290,392  | 0.178      | 0.53      | 0.245                        | -                         | 0.7                            | -                           | 0.018         | 2.0E-05   |
| rs7522239  | <i>MCOLN3</i>                  | UTR3       | -         | 1p22.3  | 85,484,366  | 0.149      | 0.10      | 0.840                        | -                         | 0.2                            | -                           | -0.020        | 2.1E-05   |
| rs6733100  | <i>LINC01320, LOC100288911</i> | intergenic | -         | 2p22.3  | 36,520,350  | 0.240      | 0.01      | 0.631                        | -                         | 0.4                            | -                           | -0.017        | 2.2E-05   |
| rs6056373  | <i>PLCB1, PLCB4</i>            | intergenic | -         | 20p12.3 | 9,040,569   | 0.101      | 0.79      | 0.138                        | -                         | 0.7                            | -                           | 0.023         | 2.8E-05   |
| rs11770740 | <i>COL26A1</i>                 | intronic   | -         | 7q22.1  | 101,102,046 | 0.125      | 0.43      | 0.156                        | -                         | 0.8                            | -                           | -0.021        | 2.9E-05   |

Abbreviations: Freq. GWAS, allele frequency in the 917 Amish subjects included in the GWAS; Freq. 1000g<sub>(EUR)</sub>, allele frequency in Total European Ancestry population from 1000 Genomes; Freq. ESP<sub>(EA)</sub>, allele frequency in European American population from the National Heart, Lung, and Blood Institute (NHLBI) Exome Sequencing Project (ESP); Enrich. 1000g<sub>(EUR)</sub>, enrichment of allele frequency in the 917 Amish subjects included in the GWAS compared to allele frequency in Total European Ancestry population from 1000 Genomes (Freq. GWAS/Freq. 1000g<sub>(EUR)</sub>); Enrich. ESP<sub>(EA)</sub>, enrichment of allele frequency in the 917 Amish subjects included in the GWAS compared to allele frequency in European American population from the NHLBI ESP (Freq. GWAS/Freq. ESP<sub>(EA)</sub>).
