# Supplementary material for: From Genotype to Phenotype: Nonsense Variants in SLC13A1 Are Associated with Decreased Serum Sulfate and Increased Serum Aminotransferases
Source: PubMed Central journal article supplement (PMC5015947; doi:10.1534/g3.116.032979), 2016-07-13
Supplement: supp_g3.116.032979_TableS7.pdf [file supp_g3.116.032979_TableS7.pdf]

**Table S7. Associations between sulfate-lowering SNVs, and bone mineral density (BMD) measurements.**

| Trait                                     | Sulfate-lowering SNV(s)     | n   | Het. | Hom. | $\beta_{\text{SNV}} \pm \text{SE}$ | $\beta_{\text{SNV}}/\text{Mean}_{\text{WT}}$ | $P_{\text{SNV}}$           |
|-------------------------------------------|-----------------------------|-----|------|------|------------------------------------|----------------------------------------------|----------------------------|
| Mid-arm BMD (g/cm <sup>2</sup> )          | <i>SLC13A1</i> R12X or W48X | 680 | 20   | 0    | -0.02 ± 0.01                       | -0.04                                        | 0.08                       |
|                                           | <i>SLC26A1</i> L348P        | 646 | 70   | 6    | -0.01 ± 0.01                       | -0.02                                        | <b>0.03</b>                |
| Mid-arm Z-Score                           | <i>SLC13A1</i> R12X or W48X | 680 | 20   | 0    | -0.45 ± 0.24                       | -0.48                                        | 0.07                       |
|                                           | <i>SLC26A1</i> L348P        | 646 | 70   | 6    | -0.22 ± 0.12                       | -0.23                                        | 0.06                       |
| 1/3-arm BMD (g/cm <sup>2</sup> )          | <i>SLC13A1</i> R12X or W48X | 680 | 20   | 0    | -0.03 ± 0.02                       | -0.04                                        | 0.08                       |
|                                           | <i>SLC26A1</i> L348P        | 646 | 70   | 6    | -0.02 ± 0.01                       | -0.02                                        | <b>0.03</b>                |
| 1/3-arm Z-Score                           | <i>SLC13A1</i> R12X or W48X | 680 | 20   | 0    | -0.50 ± 0.25                       | -0.55                                        | <b>0.04</b>                |
|                                           | <i>SLC26A1</i> L348P        | 646 | 70   | 6    | -0.22 ± 0.12                       | -0.24                                        | 0.06                       |
| Total-arm BMD (g/cm <sup>2</sup> )        | <i>SLC13A1</i> R12X or W48X | 680 | 20   | 0    | -0.02 ± 0.01                       | -0.04                                        | 0.06                       |
|                                           | <i>SLC26A1</i> L348P        | 646 | 70   | 6    | -0.02 ± 0.01                       | -0.02                                        | <b>0.01</b>                |
| Total-arm Z-Score                         | <i>SLC13A1</i> R12X or W48X | 680 | 20   | 0    | -0.47 ± 0.24                       | -0.51                                        | 0.05                       |
|                                           | <i>SLC26A1</i> L348P        | 646 | 70   | 6    | -0.24 ± 0.11                       | -0.25                                        | <b>0.04</b>                |
| Ultra-distal-arm BMD (g/cm <sup>2</sup> ) | <i>SLC13A1</i> R12X or W48X | 680 | 20   | 0    | -0.02 ± 0.01                       | -0.03                                        | 0.26                       |
|                                           | <i>SLC26A1</i> L348P        | 646 | 70   | 6    | -0.01 ± 0.01                       | -0.03                                        | <b>0.03</b>                |
| Ultra-distal-arm Z-Score                  | <i>SLC13A1</i> R12X or W48X | 680 | 20   | 0    | -0.29 ± 0.24                       | -0.40                                        | 0.23                       |
|                                           | <i>SLC26A1</i> L348P        | 646 | 70   | 6    | -0.24 ± 0.12                       | -0.32                                        | <b>0.04</b>                |
| Femoral neck BMD (g/cm <sup>2</sup> )     | <i>SLC13A1</i> R12X or W48X | 681 | 20   | 0    | -0.02 ± 0.03                       | -0.02                                        | 0.46                       |
|                                           | <i>SLC26A1</i> L348P        | 647 | 70   | 6    | -0.02 ± 0.01                       | -0.02                                        | 0.26                       |
| Femoral neck Z-Score                      | <i>SLC13A1</i> R12X or W48X | 681 | 20   | 0    | -0.20 ± 0.24                       | -0.37                                        | 0.42                       |
|                                           | <i>SLC26A1</i> L348P        | 647 | 70   | 6    | -0.12 ± 0.11                       | -0.23                                        | 0.30                       |
| Intertrochanter BMD (g/cm <sup>2</sup> )  | <i>SLC13A1</i> R12X or W48X | 680 | 20   | 0    | -0.04 ± 0.04                       | -0.03                                        | 0.35                       |
|                                           | <i>SLC26A1</i> L348P        | 646 | 70   | 6    | -0.05 ± 0.02                       | -0.04                                        | <b>5.1x10<sup>-3</sup></b> |
| Intertrochanter Z-Score                   | <i>SLC13A1</i> R12X or W48X | 680 | 20   | 0    | -0.24 ± 0.22                       | -0.50                                        | 0.29                       |
|                                           | <i>SLC26A1</i> L348P        | 646 | 70   | 6    | -0.30 ± 0.11                       | -0.62                                        | <b>5.2x10<sup>-3</sup></b> |
| Total-hip BMD (g/cm <sup>2</sup> )        | <i>SLC13A1</i> R12X or W48X | 681 | 20   | 0    | -0.03 ± 0.03                       | -0.03                                        | 0.28                       |
|                                           | <i>SLC26A1</i> L348P        | 647 | 70   | 6    | -0.04 ± 0.01                       | -0.04                                        | <b>0.01</b>                |
| Total-hip Z-Score                         | <i>SLC13A1</i> R12X or W48X | 681 | 20   | 0    | -0.29 ± 0.23                       | -0.49                                        | 0.21                       |
|                                           | <i>SLC26A1</i> L348P        | 647 | 70   | 6    | -0.27 ± 0.11                       | -0.45                                        | <b>0.02</b>                |
| Trochanter BMD (g/cm <sup>2</sup> )       | <i>SLC13A1</i> R12X or W48X | 680 | 20   | 0    | -0.03 ± 0.03                       | -0.04                                        | 0.23                       |
|                                           | <i>SLC26A1</i> L348P        | 646 | 70   | 6    | -0.03 ± 0.01                       | -0.03                                        | <b>0.04</b>                |
| Trochanter Z-Score                        | <i>SLC13A1</i> R12X or W48X | 680 | 20   | 0    | -0.32 ± 0.23                       | -0.53                                        | 0.17                       |
|                                           | <i>SLC26A1</i> L348P        | 646 | 70   | 6    | -0.23 ± 0.11                       | -0.38                                        | <b>0.04</b>                |
| Total-spine BMD (g/cm <sup>2</sup> )      | <i>SLC13A1</i> R12X or W48X | 679 | 20   | 0    | -0.03 ± 0.03                       | -0.03                                        | 0.39                       |
|                                           | <i>SLC26A1</i> L348P        | 645 | 70   | 6    | -0.03 ± 0.02                       | -0.03                                        | 0.10                       |
| Total-spine Z-Score                       | <i>SLC13A1</i> R12X or W48X | 679 | 20   | 0    | -0.25 ± 0.29                       | -0.92                                        | 0.39                       |
|                                           | <i>SLC26A1</i> L348P        | 645 | 70   | 6    | -0.19 ± 0.14                       | -0.67                                        | 0.18                       |
| Whole-body BMD (g/cm <sup>2</sup> )       | <i>SLC13A1</i> R12X or W48X | 679 | 20   | 0    | -0.03 ± 0.02                       | -0.03                                        | 0.19                       |
|                                           | <i>SLC26A1</i> L348P        | 645 | 69   | 6    | -0.03 ± 0.01                       | -0.03                                        | <b>6.8x10<sup>-3</sup></b> |

Adjusted for age and gender. Abbreviations: Het., heterozygotes; Hom., homozygotes; WT, wild type; SE, standard error.
