# Supplementary material for: From Genotype to Phenotype: Nonsense Variants in SLC13A1 Are Associated with Decreased Serum Sulfate and Increased Serum Aminotransferases
Source: PubMed Central journal article supplement (PMC5015947; doi:10.1534/g3.116.032979), 2016-07-13
Supplement: supp_g3.116.032979_TableS8.pdf [file supp_g3.116.032979_TableS8.pdf]

**Table S8. Associations between serum sulfate, and serum alanine aminotransferase (ALT) and aspartate aminotransferase (AST) levels and bone mineral density (BMD) measurements.**

| Trait                                                         | SNV covariate(s)      | n          | $\beta_{\text{SNV}} \pm \text{SE}$ | $P_{\text{SNV}}$ |
|---------------------------------------------------------------|-----------------------|------------|------------------------------------|------------------|
| ALT (U/L)                                                     | SO <sub>4</sub>       | 663        | -3.71 ± 4.31                       | 0.39             |
| Mid-shaft radius BMD (g/cm <sup>2</sup> )                     | SO <sub>4</sub>       | 660        | 0.01 ± 0.03                        | 0.70             |
| Mid-shaft radius Z-Score                                      | SO <sub>4</sub>       | 660        | -0.12 ± 0.58                       | 0.84             |
| Proximal (1/3 <sup>rd</sup> ) radius BMD (g/cm <sup>2</sup> ) | SO <sub>4</sub>       | 660        | 0.04 ± 0.04                        | 0.23             |
| Proximal (1/3 <sup>rd</sup> ) radius Z-Score                  | SO <sub>4</sub>       | 660        | 0.63 ± 0.60                        | 0.29             |
| Total forearm BMD (g/cm <sup>2</sup> )                        | SO <sub>4</sub>       | 660        | 0.02 ± 0.03                        | 0.55             |
| Total forearm Z-Score                                         | SO <sub>4</sub>       | 660        | 0.10 ± 0.57                        | 0.86             |
| Ultra-distal radius BMD (g/cm <sup>2</sup> )                  | SO <sub>4</sub>       | 660        | 0.01 ± 0.03                        | 0.80             |
| Ultra-distal radius Z-Score                                   | SO <sub>4</sub>       | 660        | -0.02 ± 0.57                       | 0.98             |
| AST (U/L)                                                     | SO <sub>4</sub>       | 663        | 4.29 ± 3.01                        | 0.15             |
| Calcium (mg/dL)                                               | SO <sub>4</sub>       | 663        | 0.01 ± 0.18                        | 0.97             |
| Corrected calcium (mg/dL)                                     | SO <sub>4</sub>       | 663        | 0.08 ± 0.15                        | 0.62             |
| Femoral neck BMD (g/cm <sup>2</sup> )                         | SO <sub>4</sub>       | 661        | 0.01 ± 0.07                        | 0.84             |
| Femoral neck Z-Score                                          | SO <sub>4</sub>       | 661        | -0.04 ± 0.57                       | 0.95             |
| Intertrochanter BMD (g/cm <sup>2</sup> )                      | <b>SO<sub>4</sub></b> | <b>661</b> | <b>0.18 ± 0.09</b>                 | <b>0.04</b>      |
| Intertrochanter Z-Score                                       | SO <sub>4</sub>       | 661        | 0.99 ± 0.52                        | 0.06             |
| Total hip BMD (g/cm <sup>2</sup> )                            | SO <sub>4</sub>       | 661        | 0.13 ± 0.07                        | 0.08             |
| Total hip Z-Score                                             | SO <sub>4</sub>       | 661        | 0.88 ± 0.055                       | 0.11             |
| Trochanter BMD (g/cm <sup>2</sup> )                           | <b>SO<sub>4</sub></b> | <b>661</b> | <b>0.13 ± 0.06</b>                 | <b>0.03</b>      |
| Trochanter Z-Score                                            | SO <sub>4</sub>       | 661        | 1.09 ± 0.54                        | 0.04             |
| Lumbar spine BMD (g/cm <sup>2</sup> )                         | SO <sub>4</sub>       | 659        | 0.07 ± 0.08                        | 0.39             |
| Lumbar Spine Z-Score                                          | SO <sub>4</sub>       | 659        | 0.50 ± 0.68                        | 0.47             |
| Whole-body BMD (g/cm <sup>2</sup> )                           | SO <sub>4</sub>       | 659        | 0.04 ± 0.06                        | 0.46             |

Adjusted for age and gender. Abbreviations: SO<sub>4</sub>, sulfate; SE, standard error.
